# Supplementary material for: A highly efficient purely organic room-temperature phosphorescence film based on a selenium-containing emitter for sensitive oxygen detection
Source: Royal Society of Chemistry journal article supplement (doi:10.1039/d1tc02324a), 2021-01-01
Supplement: d1tc02324a1.pdf [file d1tc02324a1.pdf]

## Supporting Information

### Highly Efficient Purely Organic Room-Temperature Phosphorescence Film based on a Selenium-Containing Emitter for Sensitive Oxygen Detection

Shuai Wang, Haiyang Shu, Xianchao Han, Xiaofu Wu, Hui Tong\*, Lixiang Wang\*

#### 1. Experimental details

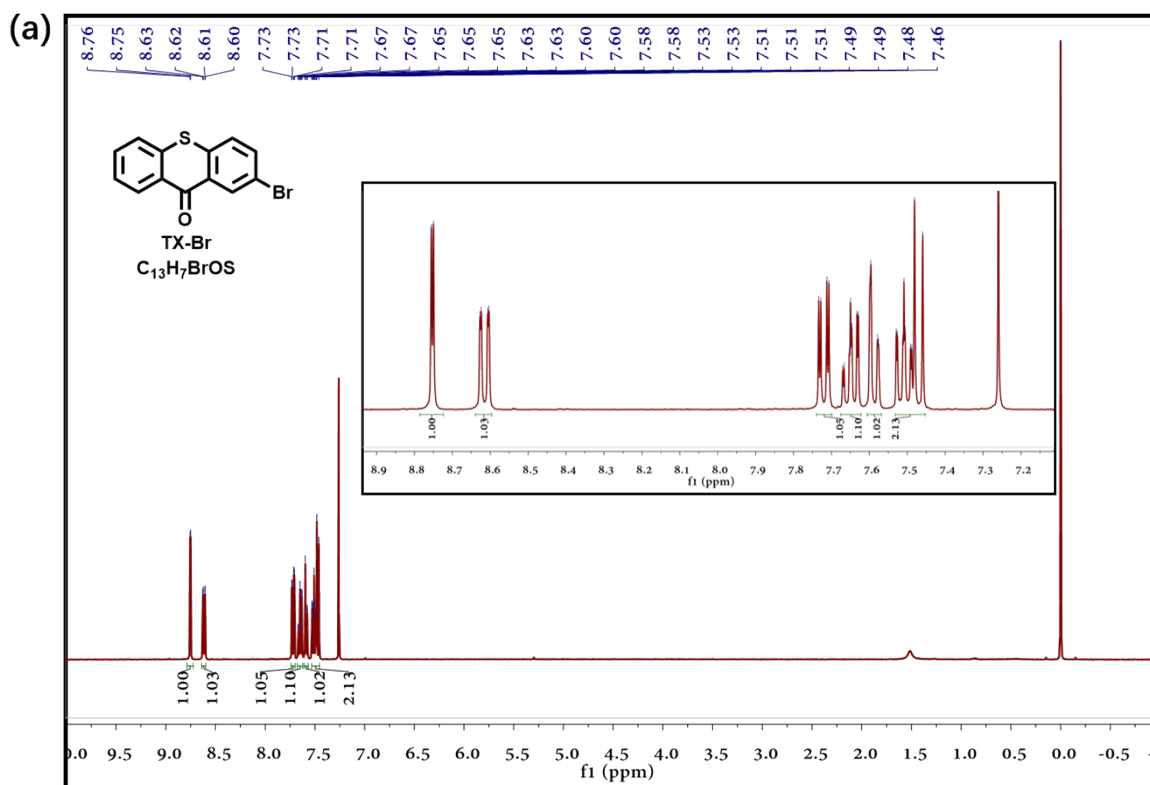

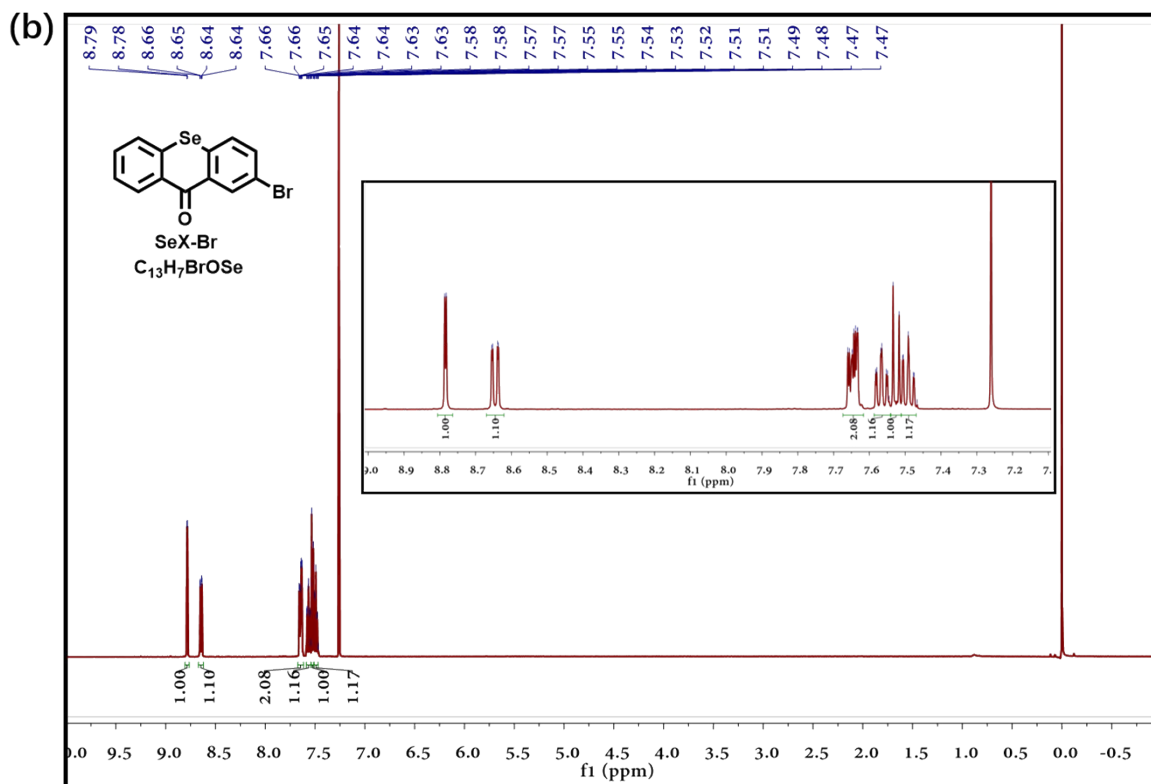

Figure S1.  $^1H$  NMR of TX-Br (a) and SeX-Br (b)

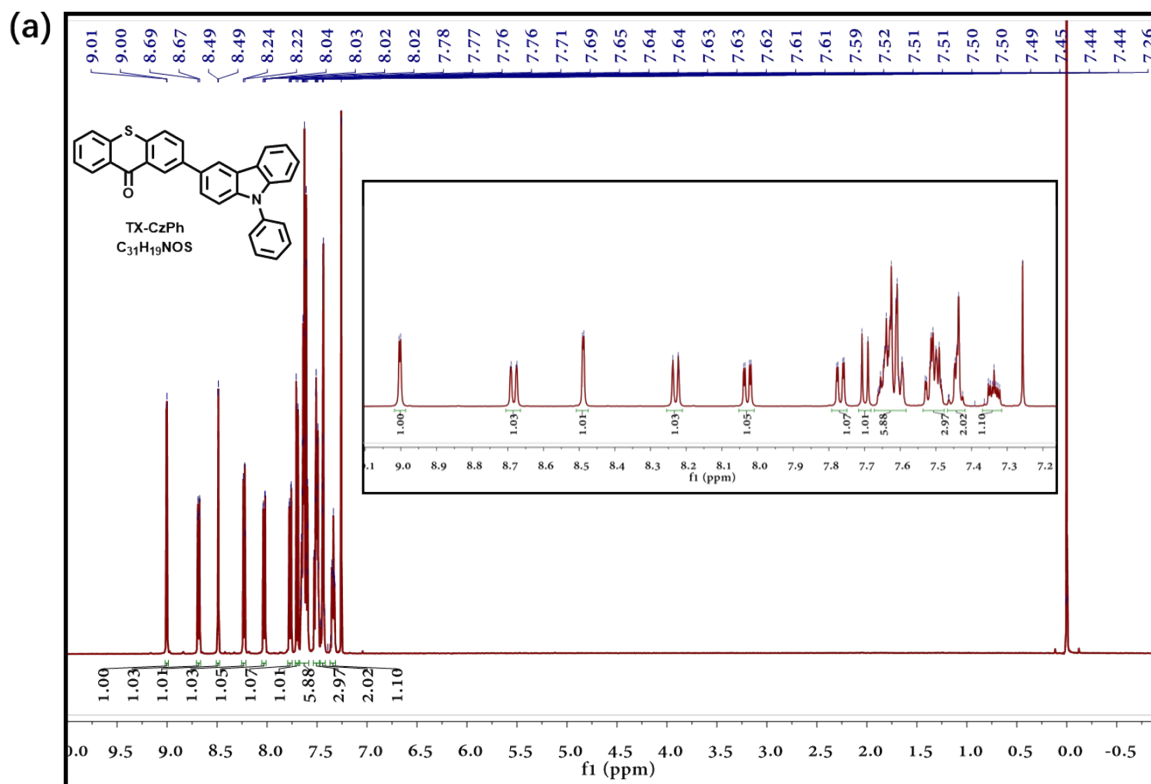

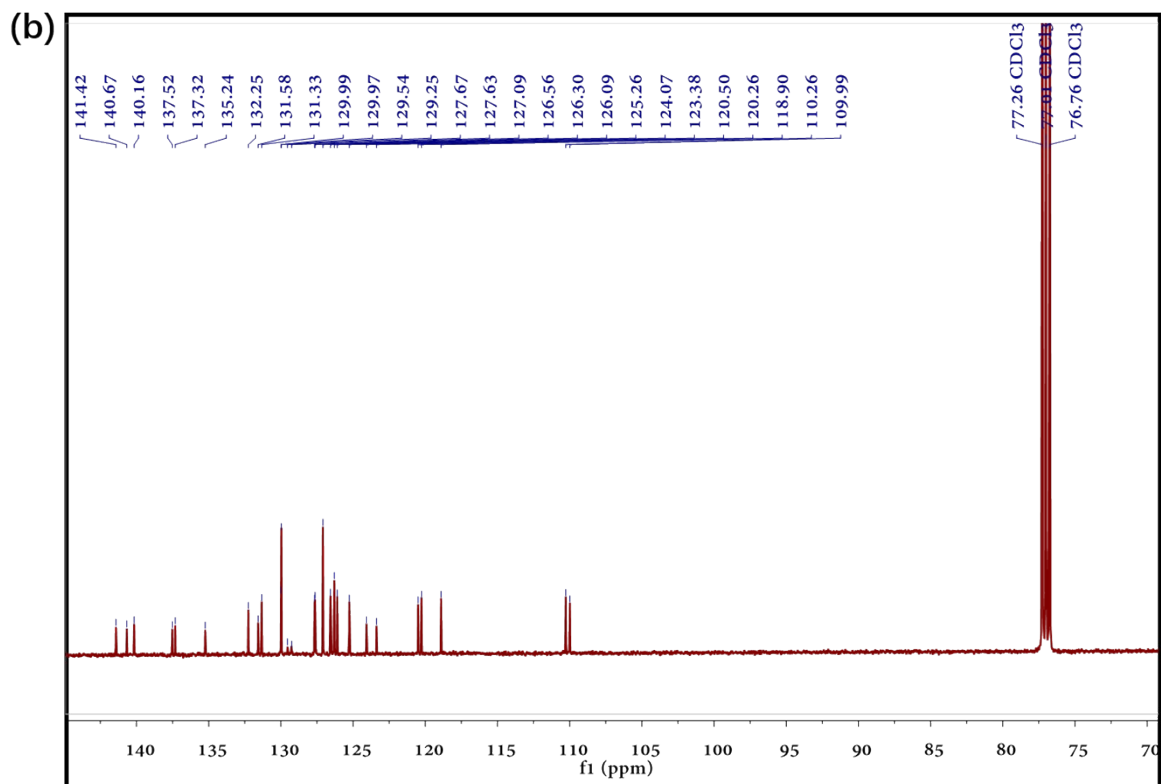

Figure S2. <sup>1</sup>H NMR (a) and <sup>13</sup>C NMR (b) of TX-CzPh

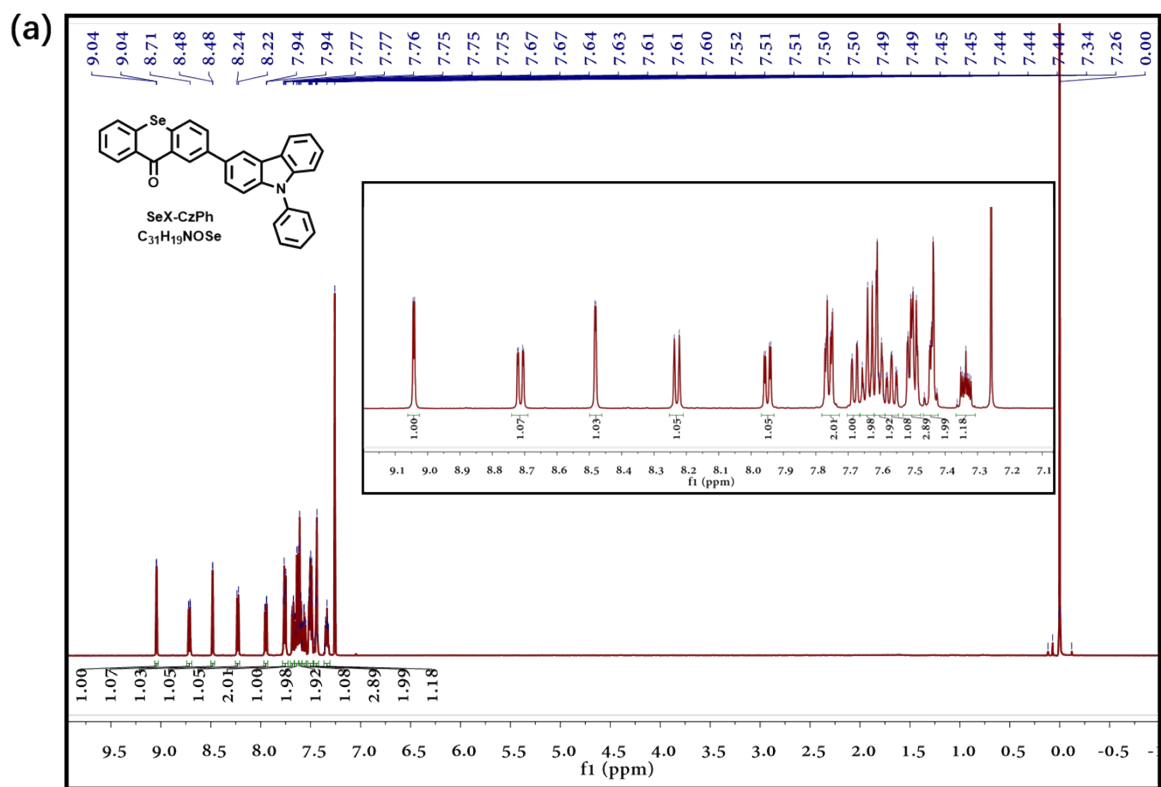

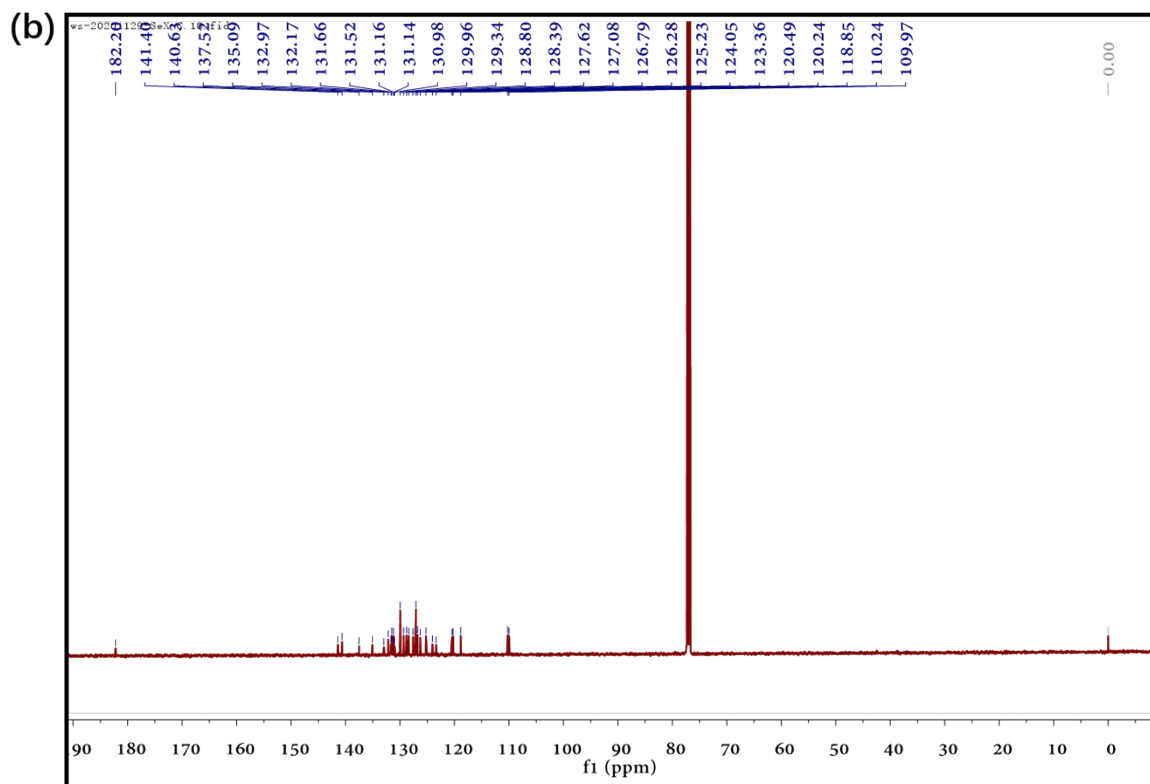

Figure S3.  $^1\text{H}$  NMR (a) and  $^{13}\text{C}$  NMR (b) of SeX-CzPh

## 2. Photophysical measurements

The radiative rate constants of fluorescence ( $k_r^F$ ), phosphorescence ( $k_r^P$ ), the intersystem crossing rate constant ( $k_{ISC}$ ), and the sum of the nonradiative constant of phosphorescence ( $k_{nr}^P$ ) and quenching rate of T<sub>1</sub> ( $k_q$ ) of SeX-CzPh and TX-CzPh were calculated according to the following equations:

$$\Phi_{FL} = 1 - \Phi_{ISC} - \Phi_{nr}^F \quad (S1)$$

$$\Phi_{Ph} = \Phi_{ISC} - \Phi_{nr}^P - \Phi_q \quad (S2)$$

$$k_r^F = \frac{\Phi_{FL}}{\tau_{FL}} \quad (S3)$$

$$k_{ISC} = \frac{\Phi_{ISC}}{\tau_{FL}} \quad (S4)$$

$$\frac{1}{\tau_{FL}} = k_r^F + k_{nr}^F + k_{ISC} \quad (S5)$$

$$\Phi_{FL} = \frac{k_r^F}{k_r^F + k_{nr}^F + k_{ISC}} \quad (S6)$$

$$\frac{1}{\tau_{Ph}} = k_r^P + k_{nr}^P + k_q \quad (S7)$$

$$\Phi_{Ph} = \frac{\Phi_{ISC} k_r^P}{k_r^P + k_{nr}^P + k_q} \quad (S8)$$

where  $\Phi_{FL}$ ,  $\Phi_{Ph}$  and  $\Phi_{ISC}$  are the absolute quantum yield of fluorescence, phosphorescence and intersystem crossing, and  $\Phi_{nr}^F$  and  $\Phi_{nr}^P$  is the nonradiative absolute quantum yield of fluorescence and phosphorescence, and  $k_q$  is the quenching absolute quantum yield of T<sub>1</sub>, and  $\tau_{FL}$  and  $\tau_{Ph}$  are the average lifetime of fluorescence and phosphorescence, and  $k_{nr}^F$  is the nonradiative constant of fluorescence. The quantum yield of the intersystem crossing ( $\Phi_{ISC}$ ) could be assumed to be  $1 - \Phi_{FL}$  according to the following equations (S1) and (S2), since both SeX-CzPh and TX-CzPh showed intense phosphorescence emission with negligible fluorescence emission in 2-methyltetrahydrofuran solutions at 77 K.<sup>1-2, 5</sup>

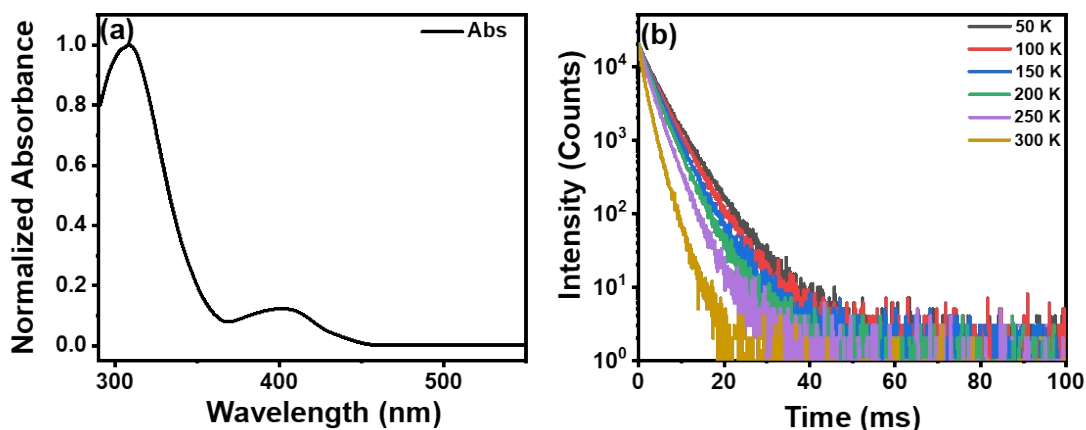

**Figure S4.** (a) UV-vis spectra of SeX-CzPh in toluene and (b) temperature-dependent time-resolved PL decay spectra of SeX-CzPh doped film at 500 nm.

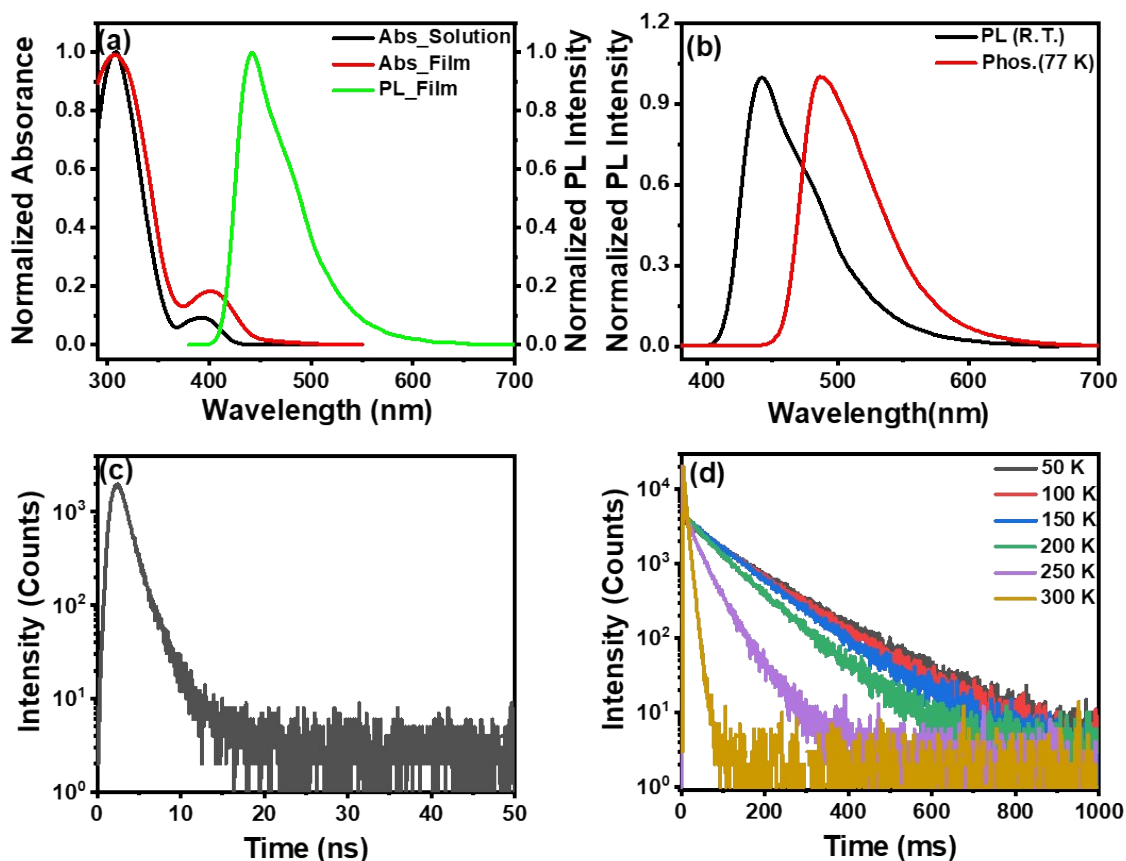

**Figure S5.** (a) UV-vis spectra of TX-CzPh in toluene (black) and doped film (red) and steady-state PL spectra of TX-CzPh doped film (green) at room temperature; (b) steady-state PL (black) at room temperature and delay spectra (red) at 77 K (delay time: 1 ms) of TX-CzPh doped film; (c) time-resolved PL decay spectra measured at 441 nm of TX-CzPh doped film at room temperature; (d) temperature-dependent time-resolved PL decay spectra of TX-CzPh doped film at 487 nm.

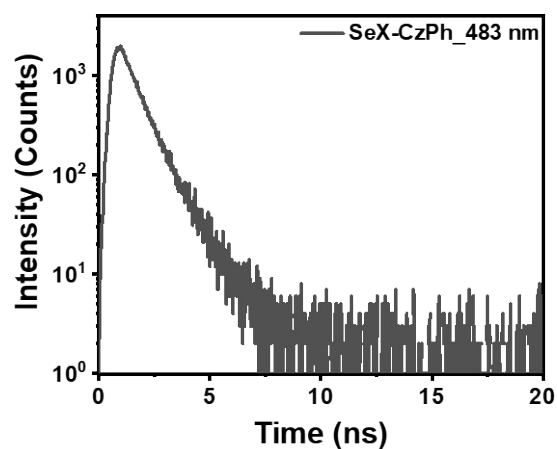

**Figure S6.** Time-resolved PL decay spectra measured at 483 nm of SeX-CzPh crystal powder at room temperature

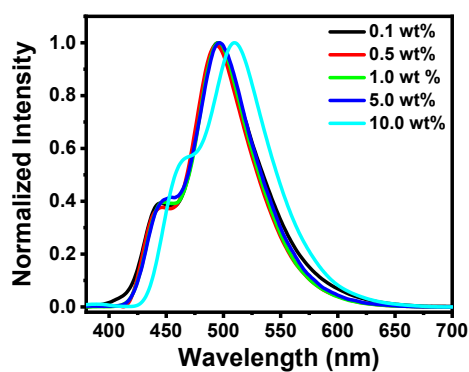

**Figure S7.** Steady-state PL spectra of SeX-CzPh doped film with different doping concentrations

The PLQY of 0.1 wt%, 0.5 wt%, 1 wt%, 5 wt% and 10 wt% SeX-CzPh doped films in vacuum at room temperature are 47.9%, 47.6%, 48.1%, 46.9% and 39.8%, respectively.

**Table S1.** Summary of phosphorescent quantum yields of organic RTP materials doped films

| Compound        | Host               | $\lambda_{\text{PL}}$<br>[nm] | $\Phi_{\text{Ph}}$<br>[%] | Ref              |
|-----------------|--------------------|-------------------------------|---------------------------|------------------|
| DPTZ-DBT        | Zeonex             | 540                           | 60                        | 1                |
| 4               | $\beta$ -estradiol | 550                           | 50                        | 2                |
| <b>SeX-CzPh</b> | <b>PS</b>          | <b>500</b>                    | <b>44.3</b>               | <b>This work</b> |
| HTO             | PVA                | 467                           | 44                        | 3                |
| 2a              | Zeonex             | 554                           | 39.5                      | 4                |
| PSe2            | DPEPO              | 500                           | 35                        | 5                |
| PVA-100-2-HC-1  | PVA                | 470                           | 29.2                      | 6                |
| <b>TX-CzPh</b>  | <b>PS</b>          | <b>487</b>                    | <b>10.1</b>               | <b>This work</b> |
| I-BF2dbm-OCH3   | PMMA               | 517                           | 4.5                       | 7                |
| TXCl            | PMMA               | 487                           | 0.95                      | 8                |



**Table S2.** Summary of the photophysical properties of SeX-CzPh and TX-CzPh

|          | State          | $\lambda_{\text{PL}}$<br>[nm] | $\Phi_{\text{PL}}$<br>[%] | $\Phi_{\text{FL}}$<br>[%] | $\Phi_{\text{Ph}}$<br>[%] | $\tau_{\text{FL}}$<br>[ns] | $\tau_{\text{ph}}$<br>[ms] | $k_r^F$<br>[ $10^7 \text{ s}^{-1}$ ] | $k_{\text{ISC}}$<br>[ $10^8 \text{ s}^{-1}$ ] | $k_r^P$<br>[ $10^2 \text{ s}^{-1}$ ] | $k_{nr} + k_q$<br>[ $10^3 \text{ s}^{-1}$ ] |
|----------|----------------|-------------------------------|---------------------------|---------------------------|---------------------------|----------------------------|----------------------------|--------------------------------------|-----------------------------------------------|--------------------------------------|---------------------------------------------|
| SeX-CzPh | Doped Film     | 453, 500                      | 48.1                      | 3.8                       | 44.3                      | 1.08                       | 1.62                       | 3.5                                  | 8.9                                           | 2.8                                  | 0.3                                         |
|          | Crystal Powder | 481, 544                      | 5.0                       | 2.1                       | 2.9                       | 0.79                       | 0.016                      | 2.6                                  | 12.4                                          | 18.9                                 | 61.7                                        |
| TX-CzPh  | Doped Film     | 441, 487                      | 21.9                      | 11.8                      | 10.1                      | 1.35                       | 10.35                      | 8.7                                  | 6.5                                           | 0.1                                  | 0.9                                         |
|          | Crystal Powder | 472, 529                      | 29.3                      | 7.6                       | 21.7                      | 1.21                       | 0.61                       | 6.3                                  | 7.7                                           | 3.9                                  | 1.3                                         |

**Table S3** Photophysical properties of TX-CzPh and SeX-CzPh

|                       | TX-CzPh <sup>a</sup> |                      | SeX-CzPh <sup>a</sup> |                     | SeX-CzPh <sup>b</sup> |                                |
|-----------------------|----------------------|----------------------|-----------------------|---------------------|-----------------------|--------------------------------|
| $\lambda_{\text{em}}$ | 441 nm               | 487 nm               | 451 nm                | 500 nm              | 483 nm                | 543 nm                         |
| $\tau_{\text{avg}}$   | 1.35 ns              | 10.31 ms             | 1.08 ns               | 1.65 ms             | 0.79 ns               | 15.74 $\mu\text{s}$            |
| $\tau_1$              |                      | 1.88 ms<br>(8.2 %)   |                       | 0.07 ms<br>(3.4 %)  |                       | 15.24 $\mu\text{s}$<br>(99.5%) |
| $\tau_2$              |                      | 7.76 ms<br>(53.5 %)  |                       | 0.86 ms<br>(34.4 %) |                       | 533.12 $\mu\text{s}$<br>(0.5%) |
| $\tau_3$              |                      | 15.71 ms<br>(38.3 %) |                       | 2.12 ms<br>(62.2 %) |                       |                                |

<sup>a</sup> doped film. <sup>b</sup> crystal powder

### 3. Oxygen Sensing

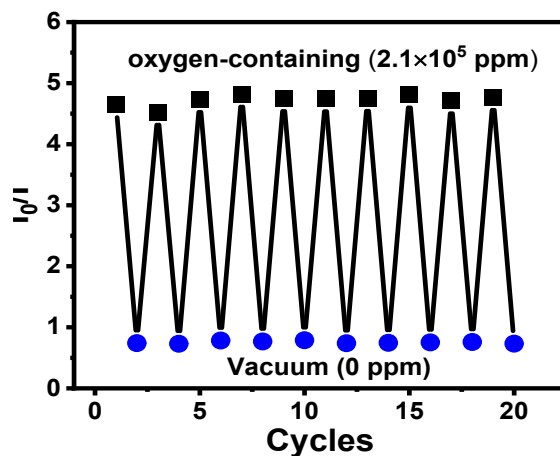

**Figure S8.** Reversible oxygen response of the TX-CzPh doped film

**Table S4.** Summary of the oxygen sensing properties of some phosphorescent materials

| Probe                       | Linear<br>[10 <sup>4</sup> ppm] | $K_{SV} \times 10^{-4}$<br>[ppm <sup>-1</sup> ] | LOD <sup>a</sup><br>[ppm] | R <sup>2</sup> | Test method  | Ref       |
|-----------------------------|---------------------------------|-------------------------------------------------|---------------------------|----------------|--------------|-----------|
| SeX-CzPh                    | 0-21                            | 1.27                                            | 4.9                       | 0.997          | PL Intensity | This work |
| TX-CzPh                     | 0-4                             | 1.08                                            | 10.7                      | 0.994          | PL Intensity | This work |
| TBBU                        | 0-21                            | 1.26                                            | 5.0                       | 0.998          | Lifetime     | 9         |
| SNPs                        | 0-3                             | 1.92                                            | 3.3                       | 0.994          | PL Intensity | 10        |
| 2FT                         | 0-0.3                           | 5.32                                            | 1.2                       | 0.999          | PL Intensity | 11        |
| 4FT                         | 0-0.3                           | 4.04                                            | 1.6                       | 0.977          | PL Intensity |           |
| Lu-DVDMS                    | 0-1                             | 0.062                                           | 100.4                     | -              | PL Intensity | 12        |
| Cu(POP)phencarz]-<br>BF4-PS | 0-100                           | 0.15                                            | 41.7                      | 0.997          | PL Intensity | 13        |
| Pd-Al LDHs/Pd-<br>TCPP      | 0-100                           | 0.008                                           | 777.9                     | 0.972          | PL Intensity | 14        |

#### 4. X-ray crystallographic analysis

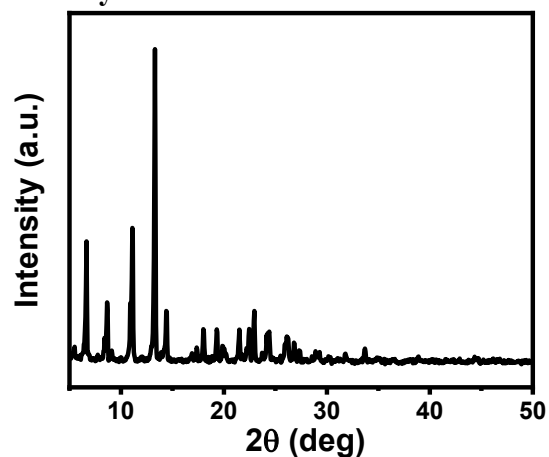

Figure S9. Powder X-ray diffraction patterns of SeX-CzPh crystal powder

Table S5. Single crystal Data of SeX-CzPh

| Name                       | SeX-CzPh                                         |               |
|----------------------------|--------------------------------------------------|---------------|
| Empirical formula          | C <sub>31</sub> H <sub>19</sub> NOSe             |               |
| Formula weight             | 500.43                                           |               |
| Temperature                | 301(2)                                           |               |
| Crystal system             | Monoclinic                                       |               |
| Space group                | P21/c                                            |               |
| Unit cell dimensions       | a = 4.0113(4)                                    | alpha = 90.00 |
|                            | b = 20.9812(19)                                  | beta = 94.065 |
|                            | c = 25.560 (2)                                   | gamma = 90.00 |
| Volume                     | 2145.8(4)                                        |               |
| Z                          | 4                                                |               |
| Density                    | 1.549                                            |               |
| F (000)                    | 1016.0                                           |               |
| Radiation                  | Mo K $\alpha$ radiation ( $\lambda$ = 0.71073 Å) |               |
| Cell measurement theta min | 2.5858                                           |               |
| Cell measurement theta max | 27.7594                                          |               |

## 5. Theoretical calculation results

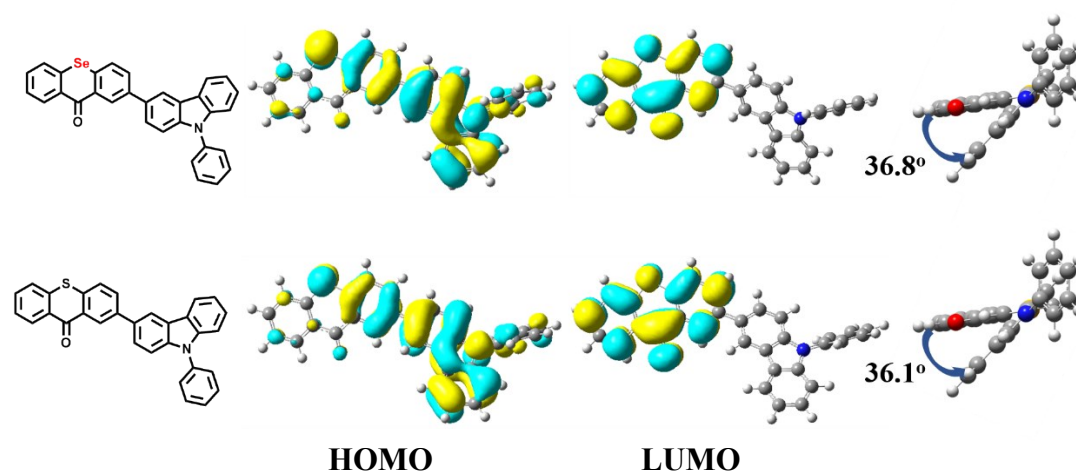

**Figure S10.** The molecular orbital distributions and the dihedral angles of SeX-CzPh and TX-CzPh

|                | SeX-CzPh |          |        | TX-CzPh        |          |   |        |
|----------------|----------|----------|--------|----------------|----------|---|--------|
|                | Hole     | Electron |        | Hole           | Electron |   |        |
| S <sub>1</sub> |          | →        | (n,π*) | S <sub>1</sub> |          | → | (n,π*) |
| T <sub>1</sub> |          | →        | (π,π*) | T <sub>1</sub> |          | → | (π,π*) |
| T <sub>2</sub> |          | →        | (π,π*) | T <sub>2</sub> |          | → | (π,π*) |
| T <sub>3</sub> |          | →        | (π,π*) | T <sub>3</sub> |          | → | (π,π*) |
| T <sub>4</sub> |          | →        | (π,π*) | T <sub>4</sub> |          | → | (π,π*) |
| T <sub>5</sub> |          | →        | (π,π*) | T <sub>5</sub> |          | → | (π,π*) |
| T <sub>6</sub> |          | →        | (π,π*) | T <sub>6</sub> |          | → | (π,π*) |
| T <sub>7</sub> |          | →        | (π,π*) | T <sub>7</sub> |          | → | (π,π*) |
| T <sub>8</sub> |          | →        | (π,π*) | T <sub>8</sub> |          | → | (π,π*) |

**Figure S11.** Hole-Electron analysis of SeX-CzPh and TX-CzPh in the lowest single (S<sub>1</sub>) and triplet manifolds (T<sub>n</sub>) base on the geometry of S<sub>1</sub> state.

**Table S6.** Energy levels of SeX-CzPh monomer

| <b>Excited state</b> | <b>Energy level<br/>(eV)</b> |
|----------------------|------------------------------|
| S <sub>1</sub>       | 3.7451                       |
| T <sub>1</sub>       | 3.0549                       |
| T <sub>2</sub>       | 3.3635                       |
| T <sub>3</sub>       | 3.4572                       |
| T <sub>4</sub>       | 3.6218                       |
| T <sub>5</sub>       | 3.7397                       |
| T <sub>6</sub>       | 3.7758                       |
| T <sub>7</sub>       | 4.0095                       |
| T <sub>8</sub>       | 4.1093                       |

**Table S7.** SOC constant of SeX-CzPh monomer

|                   | <b>SOC<br/>(cm<sup>-1</sup>)</b> |
|-------------------|----------------------------------|
| $\zeta_{S_0-T_1}$ | 4.09                             |
| $\zeta_{S_1-T_1}$ | 52.50                            |
| $\zeta_{S_1-T_2}$ | 3.80                             |
| $\zeta_{S_1-T_3}$ | 13.00                            |
| $\zeta_{S_1-T_4}$ | 0.99                             |
| $\zeta_{S_1-T_5}$ | 8.48                             |
| $\zeta_{S_1-T_6}$ | 4.17                             |
| $\zeta_{S_1-T_7}$ | 2.02                             |
| $\zeta_{S_1-T_8}$ | 14.20                            |

**Table S8.** Energy levels of TX-CzPh monomer

| <b>Excited state</b> | <b>Energy level<br/>(eV)</b> |
|----------------------|------------------------------|
| S <sub>1</sub>       | 3.7819                       |
| T <sub>1</sub>       | 3.1064                       |
| T <sub>2</sub>       | 3.4025                       |
| T <sub>3</sub>       | 3.4349                       |
| T <sub>4</sub>       | 3.6208                       |
| T <sub>5</sub>       | 3.7325                       |
| T <sub>6</sub>       | 3.7957                       |
| T <sub>7</sub>       | 4.0135                       |
| T <sub>8</sub>       | 4.1332                       |

**Table S9.** SOC constant of TX-CzPh monomer

|                   | <b>SOC<br/>(cm<sup>-1</sup>)</b> |
|-------------------|----------------------------------|
| $\zeta_{S_0-T_1}$ | 1.33                             |
| $\zeta_{S_1-T_1}$ | 26.19                            |
| $\zeta_{S_1-T_2}$ | 2.02                             |
| $\zeta_{S_1-T_3}$ | 4.47                             |
| $\zeta_{S_1-T_4}$ | 2.23                             |
| $\zeta_{S_1-T_5}$ | 7.87                             |
| $\zeta_{S_1-T_6}$ | 11.01                            |
| $\zeta_{S_1-T_7}$ | 3.04                             |
| $\zeta_{S_1-T_8}$ | 9.78                             |

## Reference

- 1 R. Huang, J. S. Ward, N. A. Kukhta, J. Avó, J. Gibson, T. Penfold, J. C. Lima, A. S. Batsanov, M. N. Berberan-Santos, M. R. Bryce, and F. B. Dias, *J. Mater. Chem. C*, 2018, **6**, 9238-9248.
- 2 I. Bhattacharjee, and S. Hirata, *Adv. Mater.*, 2020, **32**, 2001348.
- 3 L. Ma, S. Sun, B. Ding, X. Ma, and H. Tian, *Adv. Funct. Mater.*, 2021, **31**, 2010659.
- 4 P. Pander, A. Swist, J. Soloducho, and F. B. Dias, *Dyes Pigm.*, 2017, **142**, 315-322.
- 5 D. R. Lee, K. H. Lee, W. Shao, C. L. Kim, J. Kim, and J. Y. Lee, *Chem. Mater.*, 2020, **32**, 2583-2592.
- 6 Z. Wang, Y. Zhang, C. Wang, X. Zheng, Y. Zheng, L. Gao, C. Yang, Y. Li, L. and Qu, Y. Zhao, *Adv. Mater.*, 2020, **32**, 1907355.
- 7 L. Xiao, Y. Wu, J. Chen, Z. Yu, Y. Liu, J. Yao, and H. Fu, *J. Phys. Chem. A*, 2017, **121**, 8652-8658.
- 8 Y. Wen, H. Liu, S. Zhang, Y. Gao, Y. Yan, and B. Yang, *J. Mater. Chem. C*, 2019, **7**, 12502-12508.
- 9 Y. Zhou, W. Qin, C. Du, H. Gao, F. Zhu, and G. Liang, *Angew. Chem. Int. Ed.*, 2019, **58**, 12102-12106.
- 10 X. Q. Liu, K. Zhang, J. F. Gao, Y. Z. Chen, C. H. Tung, and L. Z. Wu, *Angew. Chem. Int. Ed.*, 2020, **59**, 23456-23460.
- 11 R. Keruckiene, D. Volyniuk, K. Leitonas, and J. V. Grazulevicius, *Sens. Actuators B Chem.*, 2020, **321**, 128533.
- 12 L. Zang, and H. Zhao, *RSC Adv.* 2020, **10**, 32938-32945.
- 13 Y. Wang, B. Li, Y. Liu, L. Zhang, Q. Zuo, L. Shi, and Z. Su, *Chem. Commun.*, 2009, 5868-5870.
- 14 Z. Xia, N. Xue, W. Shi, and C. Lu, *J. Phys. Chem. C*, 2019, **123**, 30536-30544.
